# Supplementary material for: Hyper-resolution large-scale hydrological modelling benefits from improved process representation in mountain regions
Source: Copernicus journal article supplement (doi:10.5194/egusphere-2024-3072), 2024-12-16
Supplement: Supplementary file 1 [file egusphere-2024-3072-supplement.pdf]

## S1 Variables

**Table S1.** List of model parameters. Sources for reference values: a: standard PCR-GLOBWB setup; b: Magnusson et al. (2014); c: Van Tiel et al. (2018).

| <b>1: Variables</b>       |                                                                  |                          |                                                |
|---------------------------|------------------------------------------------------------------|--------------------------|------------------------------------------------|
| <b>Symbol</b>             | <b>Variable</b>                                                  | <b>Value</b>             | <b>Units</b>                                   |
| $T$                       | Daily average temperature                                        |                          | $^{\circ}\text{C}$                             |
| $M$                       | Melt rate                                                        |                          | $\text{m day}^{-1}$                            |
| $k$                       | Day of the year since 21st of March                              |                          | -                                              |
| $P$                       | Total precipitation                                              |                          | $\text{m day}^{-1}$                            |
| $P_{\text{snowfall}}$     | Snowfall                                                         |                          | $\text{m day}^{-1}$                            |
| $Q$                       | Glacial water release                                            |                          | $\text{m day}^{-1}$                            |
| $S$                       | Glacial water storage                                            |                          | m                                              |
| SWE                       | Snow water equivalent                                            |                          | m                                              |
| <b>2: Parameters</b>      |                                                                  |                          |                                                |
| <b>Symbol</b>             | <b>Parameter</b>                                                 | <b>Value</b>             | <b>Units</b>                                   |
| $T_{\text{thresh}}$       | Threshold temperature above which melt occurs                    | 0                        | $^{\circ}\text{C}$                             |
| DDF                       | Degree-day factor                                                | $0.0025^a$               | $\text{m}^{\circ}\text{C}^{-1}\text{day}^{-1}$ |
| $\text{DDF}_{\text{max}}$ | Maximum degree-day factor, on 21st of June (NH)                  | $0.0039^b$ or calibrated | $\text{m}^{\circ}\text{C}^{-1}\text{day}^{-1}$ |
| $\text{DDF}_{\text{min}}$ | Minimum degree-day factor, on 22nd of December (NH)              | $0.0005^b$ or calibrated | $\text{m}^{\circ}\text{C}^{-1}\text{day}^{-1}$ |
| $m_m$                     | Parameter controlling the transition between melt and no melt    | $0.5^b$                  | $^{\circ}\text{C}$                             |
| $T_{\text{snowfall}}$     | Temperature below which all precipitation is snow                | $1^b$                    | $^{\circ}\text{C}$                             |
| $m_p$                     | Parameter determining the range where snow and rainfall co-occur | $1.24^b$                 | $^{\circ}\text{C}$                             |
| $C_{\text{ice}}$          | Glacier correction factor                                        | calibrated               | -                                              |
| $K_{\text{min}}$          | Tuning parameter                                                 | $0.2^c$                  | $\text{day}^{-1}$                              |
| $K_{\text{range}}$        | Tuning parameter                                                 | $0.5^c$                  | $\text{day}^{-1}$                              |
| $A_g$                     | Tuning parameter                                                 | $0.003^c$                | $\text{m}^{-1}$                                |

## S2 SWE Stations

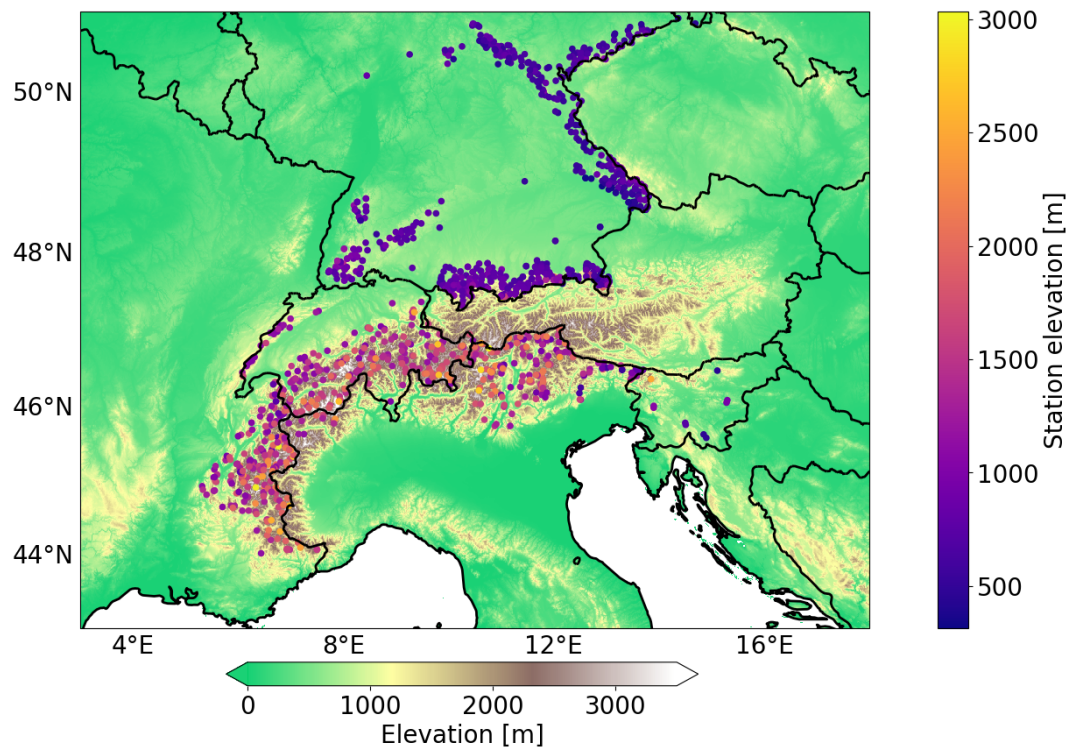

**Figure S1.** Location of the snow stations from Fontrodona-Bach et al. (2023) included in the analysis.

## References

- Fontrodona-Bach, A., Schaefli, B., Woods, R., Teuling, A. J., and Larsen, J. R.: NH-SWE: Northern Hemisphere Snow Water Equivalent dataset based on in situ snow depth time series, *Earth System Science Data*, 15, 2577–2599, <https://doi.org/10.5194/essd-15-2577-2023>, 2023.
- Magnusson, J., Gustafsson, D., Hüsler, F., and Jonas, T.: Assimilation of point SWE data into a distributed snow cover model comparing two contrasting methods, *Water Resources Research*, 50, 7816–7835, <https://doi.org/10.1002/2014WR015302>, 2014.
- Van Tiel, M., Teuling, A. J., Wanders, N., Vis, M. J. P., Stahl, K., and Van Loon, A. F.: The role of glacier changes and threshold definition in the characterisation of future streamflow droughts in glacierised catchments, *Hydrology and Earth System Sciences*, 22, 463–485, <https://doi.org/10.5194/hess-22-463-2018>, 2018.
